# Supplementary material for: Comparative Effectiveness of Dipeptidylpeptidase-4 Inhibitors in Type 2 Diabetes: A Systematic Review and Mixed Treatment Comparison
Source: PubMed Central journal article supplement — Diabetes Ther. 2014 Mar 25;5(1):1–41. doi: 10.1007/s13300-014-0061-3 (PMC4065303; doi:10.1007/s13300-014-0061-3), 2014-03-25
Supplement: 13300_2014_61_MOESM2_ESM.pdf [file 13300_2014_61_MOESM2_ESM.pdf]

- Previously published indirect comparisons of the dipeptidylpeptidase-4 (DPP-4) inhibitors, used to treat patients with type 2 diabetes, have reported little or no differences with regard to efficacy and overall safety.
- We conducted a systematic review of randomized controlled trials (RCTs) of five licensed DPP-4 inhibitors (alogliptin, linagliptin, saxagliptin, sitagliptin, vildagliptin) in patients with type 2 diabetes and inadequate glycemic control, receiving any type of pharmacologic anti-diabetic treatment.
- Eighty-three RCTs meeting the review criteria were included in mixed treatment comparison meta-analyses (MTCs) and secondary frequentist direct-comparison meta-analyses for four outcomes: mean change from baseline in glycosylated hemoglobin (HbA<sub>1c</sub>) or body weight, and the proportions of patients achieving HbA<sub>1c</sub> <7%, or experiencing a hypoglycemic event.
- From available data, MTCs demonstrated no differences between the DPP-4 inhibitors, either as mono, dual or triple therapy, apart from in patients on alogliptin plus metformin, who achieved HbA<sub>1c</sub> <7% more frequently than those treated with saxagliptin plus metformin.

This summary slide represents the opinions of the authors. Sponsorship for this study was funded by Takeda Pharmaceuticals International GmbH, Zurich, Switzerland. For a full list of acknowledgments and conflicts of interest for all authors of this article, please see the full text online. Copyright © The Author(s) 2014. Creative Commons Attribution Noncommercial License (CC BY-NC).
